1 **Lineage space and the propensity of bacterial cells to undergo**  
2 **growth transitions**

3

4 Short title: Lineage and Cellular Growth Transitions

5

6 Arnab Bandyopadhyay

7 Huijing Wang

8 J. Christian J. Ray\*

9

10 Center for Computational Biology

11 Department of Molecular Biosciences

12 University of Kansas

13 2030 Becker Dr.

14 Lawrence, KS 66047

15

16

17 \* Corresponding author

18 Email: [jjray@ku.edu](mailto:jjray@ku.edu)

19 Tel: 785-864-1506

20

21

22 **Abstract**

23 The molecular makeup of the offspring of a dividing cell gradually becomes phenotypically  
24 decorrelated from the parent cell by noise and regulatory mechanisms that amplify pheno-  
25 typic heterogeneity. Such regulatory mechanisms form networks that contain thresholds  
26 between phenotypes. Populations of cells can be poised near the threshold so that a subset  
27 of the population probabilistically undergoes the phenotypic transition. We sought to char-  
28 acterize the diversity of bacterial populations around a growth-modulating threshold via  
29 analysis of the effect of non-genetic inheritance, similar to conditions that create antibiotic-  
30 tolerant persister cells and other examples of bet hedging. Using simulations and experi-  
31 mental lineage data in *Escherichia coli*, we present evidence that regulation of growth am-  
32 plifies the dependence of growth arrest on cellular lineage, causing clusters of related cells  
33 undergo growth arrest in certain conditions. Our simulations predict that lineage correla-  
34 tions and the sensitivity of growth to changes in toxin levels coincide in a critical regime.  
35 Below the critical regime, the sizes of related growth arrested clusters are distributed ex-  
36 ponentially, while in the critical regime clusters sizes are more likely to become large.  
37 Furthermore, phenotypic diversity can be nearly as high as possible near the critical regime,  
38 but for most parameter values it falls far below the theoretical limit. We conclude that  
39 lineage information is indispensable for understanding regulation of cellular growth.

40

## 41 **Author Summary**

42 One of the most important characteristics of a cell is whether it is growing. Actively grow-  
43 ing cells can multiply exponentially. In the case of infections and cancer, growth causes  
44 problems for the host organism. On the other hand, cells that have stopped growing can  
45 allocate cellular resources toward different activities, such as bacteria surviving antibiotics  
46 and tissues in multicellular organisms performing their physiological roles. Observing  
47 small bacterial colonies in a microscope over time, we have found that cells closely related  
48 to each other often have similar growth state. We were curious if lineage dependence was  
49 an intrinsic property of growth regulation or if other factors were needed to explain this  
50 effect. We therefore built a computational model of a growing and dividing cellular colony  
51 with an encoded growth regulation network. We found that regulation of growth is suffi-  
52 cient for lineage dependence to emerge. We next asked if lineage dependence constrains  
53 how diverse the cellular population can become. We found that cellular diversity can reach  
54 a peak that is nearly as high as possible near the conditions that have the highest lineage  
55 dependence, but that most conditions do not permit such high diversity. We conclude that  
56 lineage is an important constraint and discuss how the growth arrest transition is in some  
57 ways like a phase transition from physics, and in some ways strikingly different, making it  
58 a unique phenomenon.

## 59 Introduction

60 The process of cellular growth is both the distinguishing feature of living matter and  
 61 central to the roles of regulatory networks from microbes to metazoa. Growth and division  
 62 is also a primary source of phenotypic diversification. For instance, when a bacterial cell  
 63 divides, and its cellular contents become partitioned into two daughter cells, diffusible cy-  
 64 toplasmic components are often randomly distributed into the daughter cells in a binomial  
 65 distribution. Such phenotypic diversification permits populations to be robust to unpredict-  
 66 ably changing environments, a phenomenon known as bet-hedging. A striking example of  
 67 this effect is the regulation of growth rate by toxins.

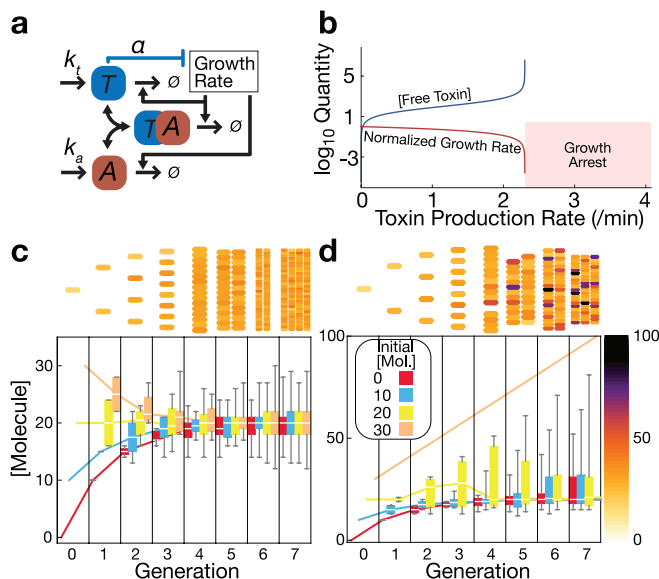

**Figure 1.** Simulated effects of a molecular network with an endogenous growth-regulating threshold in bacteria. **a.** Simplified toxin-antitoxin module, depicting its interaction with cellular growth rate. **b.** Deterministic steady state model predictions for a toxin with growth feedback. A regime with no deterministic molecular steady state (labeled "Growth Arrest") arises when toxin production sufficiently exceeds the growth feedback-imposed threshold. Growth rate is normalized to the maximum = 1. **c.** Binomial phenotypic inheritance at a constant molecule production rate. With no effect on cellular growth rate, the population exhibits regression to the mean within a few generations of division. **d.** With a discrete growth arrest threshold, the population becomes increasingly skewed over time. Box and whisker plots represent median, interquartile range, and range of a population started from a single simulated cell. Details on model implementation are presented in Supplemental Materials.

68 Most of the molecular content in the bacterial cytoplasm undergoes growth-mediated  
69 dilution (in some cases, such as most proteins, as the primary mechanism of degradation).  
70 Reduction in cellular growth rate by a cytoplasmic toxin, or other molecule with toxic ef-  
71 fect, creates an effective positive feedback loop, trapping some cells in a growth arrested  
72 state until they can escape in changed conditions [1-3]. This mechanism is associated with  
73 antibiotic-tolerant persister cells arising in the population, which cause difficulty in antibi-  
74 otic treatment [4]. Various feedback mechanisms are associated with growth bistability [5].  
75 Thus, understanding the processes that result in growth diversification is an important goal  
76 on the path to solving the impending antibiotic resistance crisis.

77 Growth arrested cells typically represent a small subset of a bacterial population [6]. In  
78 *E. coli*, growth arrested persister cells are associated with alterations in metabolic activity  
79 via the stringent response [7, 8], and with efflux of antibiotics [9]. Depending on the mech-  
80 anism of induction, persister cell fractions can be spontaneously produced or respond to  
81 external stresses [6]. Persistence in *E. coli* is associated with toxin-antitoxin systems and  
82 global metabolic regulation [10], with a core mechanism of toxins that are neutralized by  
83 antitoxins [11] (Fig. 1a-b). The competing effects of toxin and antitoxin create a threshold  
84 in a stoichiometric effect via molecular titration that can cause conditional cooperativity of  
85 TA gene regulation [12, 13]. When accounting for gene expression noise and proteolysis  
86 of antitoxins, free toxin levels will gain sufficient concentration to result in a growth feed-  
87 back mechanism that ultimately induces growth arrest in above-threshold cells. The result  
88 is skewed phenotypic distributions, with a core fast-growing group of cells along with rarer,  
89 growth arrested cells, as opposed to regression to mean levels observed in networks without  
90 the growth arrest threshold (Fig. 1c-d).

91 Motivated by observations on phenotypic inheritance [14-16] and the effects of lineage  
92 correlations on daughter cell phenotypes [17-21], we asked how much phenotypic diversity  
93 could be attained for various levels of endogenous growth regulation, and to what extent  
94 lineage determines phenotypic outcomes. Based on our previous study [17], we hypothe-  
95 sized that a higher chance of growth arrest amplifies the effects of cellular lineage on phe-  
96 notypic correlations.

97 To explore this hypothesis, we used an established experimental model of threshold-  
98 based growth arrest in *E. coli* to experimentally confirm lineage dependence. We then cre-  
99 ated a minimal multiscale computational framework that allowed more extensive charac-  
100 terization of the various growth regimes than were possible with time-lapse microscopy.  
101 Our computational model represents the processes of cellular growth and division, with  
102 binomially distributed inheritance of a simplified toxin-antitoxin-like system subject to sto-  
103 chastic molecular kinetics in individual cells over time. We modeled a functional depend-  
104 ence of growth on toxin concentrations as an exponential function with a key parameter,  $\alpha$ ,  
105 that quantifies how toxic the toxin is. We used various specific realizations of the frame-  
106 work to simulate growth of small bacterial populations from a single common ancestor and  
107 growth regulation by the simulated toxin for various toxin:antitoxin production ratios. Our  
108 computational results confirm and extend the experimental results, showing that the bet-  
109 hedging regime results in complex lineage structures.

110 These results show, for the first time, how important lineage is to growth regulation  
111 and bet-hedging phenotypes involving growth. Consideration of lineage is now indispen-  
112 sable for studies on phenotypic heterogeneity, phenotypic memory, and regulation of the  
113 growth arrest transition. Finally, our results suggest that lineage space used in evolutionary

114 [22] and multicellular organism development studies [23] is an important concept to apply  
115 in studies of bacterial phenotype.

## 116 **Results**

### 117 Lineage Dependence in an Experimental Model

118 We first sought to establish an empirical basis for growth arrest kinetics and threshold-  
119 based amplification of lineage correlations. An established experimental model of thresh-  
120 old-based growth arrest [17] provided a simple way to track growth in a lactose-sensitive  
121 strain of *E. coli*. In this model, lactose stimulates growth at sufficiently low concentrations,  
122 but creates toxicity in a subset of cells at high concentration that results growth arrest or  
123 death of those cells. Presently, the precise mechanism of toxicity is not known in this  
124 model, but the competing effects of lactose import rate and processing rate are the most  
125 likely culprit, and the threshold-based mechanism for growth arrest and persistence is es-  
126 tablished [17]. In the high-lactose condition, bacterial colonies have a slow net growth rate  
127 and a high likelihood of any individual cell eventually undergoing growth arrest and/or  
128 death.

129 We used time-lapse fluorescence microscopy to track individual microcolonies in a  
130 microfluidic device with constant perfusion of fresh minimal medium containing defined  
131 concentrations of a single sugar as the sole carbon source. We used two carbon sources: a  
132 growth-arrest-prone condition with a high lactose concentration (50 g/l), and a condition  
133 that does not induce a growth arrest threshold, with a moderate glucose concentration  
134 (2 g/l) (Fig. 2; Movies S1 and S2). As inferred from extension of cellular major axis length,  
135 cells grow exponentially at heterogeneous rates (Figs. 2a-b, 2e-f, S1) and are capable of  
136 quickly shifting between growth rates, e.g., from fast to slower or non-growing (Fig. 2b,

137 2f). To identify cases of mid-cell cycle shifts in growth rate, we fit each cell cycle to an  
138 exponential growth model, applied Bonferroni correction to the resulting fit significance  
139 levels, and selected the non-significant cases (Fig. S3). A constitutive fluorescent reporter  
140 provides clear visual evidence of mother-daughter cell correlations only in the growth ar-  
141 rest-prone condition (Fig. 2c, 2g).

142 We reconstructed the microcolony lineage in both conditions to quantify the effects of  
143 non-genetic inheritance in this experiment (Fig 2d, 2h). The result of the growth arrest  
144 threshold is a striking effect on the structure of the lineages. The growth arrest-prone line-  
145 age shows distinct clusters of growth arrested or dead cells, and clusters of faster growing  
146 cells, resulting in an asymmetric tree (Fig. 2d). On the other hand, absent the growth arrest  
147 threshold, the tree is nearly symmetric (Fig. 2h). In the growth arrest prone condition, we  
148 classified cells into being growth arrested or dead (apparent growth rate = 0) or actively  
149 growing. Of the 63 total cells in the final lineage, 16 (25.4%) were determined to be com-  
150 pletely growth arrested or dead at the final time point. We determined the pairwise lineage  
151 distance, defined as the time since the most recent common ancestor, for three subsets: all  
152 cells, only growing cells, and only growth arrested cells (Fig. S2). The all-growing and all-  
153 growth arrested subsets both had significantly closer lineage distances compared to the all  
154 cells set ( $p < 0.05$ , Mann-Whitney U). From these results, we conclude that lineage has a  
155 strong effect on phenotypic heterogeneity during colony development around a growth-  
156 modulating threshold.



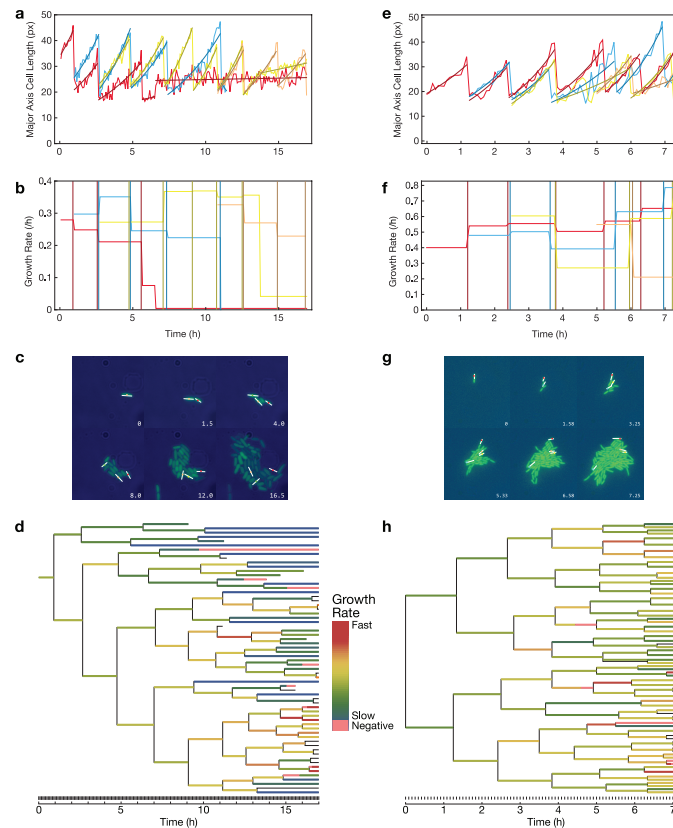

**Figure 2.** Growth rate of *E. coli* B REL606 GFP+ cells prone to stochastic growth arrest in high lactose reveals lineage dependence. Numbers indicate time in hours. **a – d.** Colony grown in a commercial microfluidic device with continuous perfusion of minimal medium containing 50 mg/ml lactose as described in Methods. **e – h.** Colony grown with continuous perfusion of minimal medium containing 2.5 mg/ml glucose, which does not predispose cells to growth arrest. **a, e.** Growth kinetics of a selection of cells. Individual trajectories are divided by cell division or different growth rates by a least-squares fit of the data to the model  $L(t) = L_0 e^{gt}$ . **b, f.** Growth rates from exponential model fit. Vertical lines indicate cell division times for the corresponding trajectory color. **c, g.** Selected frames of the time-lapse microscopy experiment. **d, h.** Lineages derived from time-lapse microscopy. Colors indicate growth rate. Lack of color indicates insufficient data for a significant fit. Note asymmetry in **d** and symmetry in **h**.

158 Lineage Dependence is Reproduced in a Simple Computational Branching Process Model

159 To determine the minimal set of mechanisms necessary to reproduce the interactions  
160 between threshold-based molecular regulation of growth rate and population dynamics, we  
161 created a computational model containing cell agents growing and dividing at a typical rate  
162 for enteric bacteria (30 minute doubling time), each with a cell volume and division upon  
163 doubling of the volume. Each cell agent has embedded stochastic kinetics of a growth-  
164 inhibiting molecule (analogous to a toxin) and a neutralizing molecule that binds and pre-  
165 vents toxicity (analogous to an antitoxin). As discussed in more detail in Methods, we as-  
166 sume toxin and antitoxin production, growth-mediated dilution, and binding-unbinding ki-  
167 netics of the molecules. We used a phenomenological exponential function layer that trans-  
168 lates between concentrations of toxin and resultant growth rate, with a single parameter,  $\alpha$ ,  
169 that determines the level of toxicity.

170 The key similarity between our experimental and computational approaches is the ex-  
171 istence of a threshold in the molecular network that determines the growth rate of the cell.  
172 There are many potential mechanisms for such a threshold to arise, as discussed in the  
173 Introduction. We do not claim that the mechanism implemented in the computational  
174 model is the same as the experimental model. Rather, there is an underlying fundamental  
175 interplay between growth regulation and lineage structure that we will show is conserved.

176 To determine the effect of the growth threshold on microcolony dynamics, we scanned  
177 the rate of toxin production, keeping antitoxin production constant. (In most natural toxin-  
178 antitoxin systems, the antitoxin is unstable. We simulated this case as well, below). The  
179 simulations were seeded with a single cell growing with excess antitoxin and permitted to  
180 grow for 100 simulation minutes before changing the toxin production rate to a positive

181 value. After several generations of growth, we found three qualitative regimes across dif-  
182 ferent toxin production rates: symmetrical growth with no or little growth arrest (toxin  
183 production rate 0-2.5 /min), a critical regime with clusters of growing and growth arrested  
184 cells (toxin production rate 3-4.5 /min), and a regime of nearly instantaneous growth arrest  
185 (toxin production rate >4.5 /min) with the colony trapped in its near-initial state. Figure 3  
186 shows representative cases with growth rate (Fig. 3a) or toxin concentration (Fig. 3b) de-  
187 picted with coloring of each cell.

188 Sub-lineages of fast-growing and slow-growing cells are evident in the critical regime  
189 (with toxin production rate 5-6 /min; Fig. 3a). Lineage effects are also evident from toxin  
190 levels, where there are sublineages escaping from entry into high toxin concentrations (blue  
191 clusters in Fig. 3b). The precise time of entry into growth arrest can have a large effect on  
192 toxin levels, suggesting that growth rate is a more precise phenotype to follow for the study  
193 of lineage effects in this system.

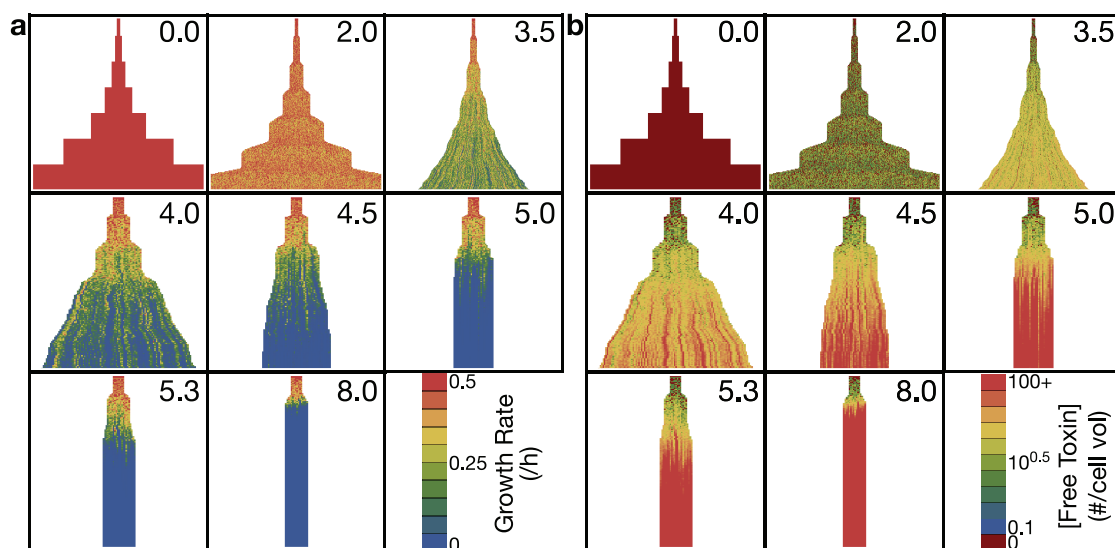

**Figure 3.** Simulated lineages over a range of toxin production rates. Time proceeds downward in each lineage and begins at the onset of toxin production ( $t = 100$  h). **a.** Lineage growth rate superimposed on the lineages. **b.** Free toxin concentration superimposed on the lineage. Lineages for production rates 3.5 /min and higher are plotted with wider trajectories for visibility.

194 Lineage Dependence is Strongest in the Critical Regime

195 To quantitatively characterize the properties of growth transitions in our simple com-  
196 putational framework, we considered the fate of simulated microcolonies at 250 minutes  
197 of growth, which is shortly before the fastest growing cases begin to become computation-  
198 ally intractable, but after the population size is beyond the minimal requirement to be con-  
199 sidered a microcolony. Mean population growth rates and toxin concentrations across mul-  
200 tiple (N = 100) replicates reveal a growth-regulatable region flanked by regions of almost  
201 full growth and almost complete growth arrest (Fig. 4a). In the region where population  
202 growth is low but positive, toxin concentrations increase monotonically but non-linearly  
203 with increases in toxin production (Fig. 4a).

204 To quantify the amount of lineage information shared by pairs of cells in their pheno-  
 205 types, we calculated mutual information between phenotypic differences between pairs of  
 206 cells and pairwise lineage distance. From each simulation, we sampled one pair of cells  
 207 randomly to ensure independent, identically distributed samples and performed a  
 208 resampling procedure 100 times to increase the confidence in our estimate. This was done  
 209 for absolute growth rate differences and absolute toxin concentration differences (Fig. 4b).  
 210 Various studies of have found mutual information between different points on a lattice to  
 211 be indicative of a phase transition [24, 25]. While our model may not exhibit a true phase  
 212 transition, our mutual information estimator reveals a similar peak for both growth rate and

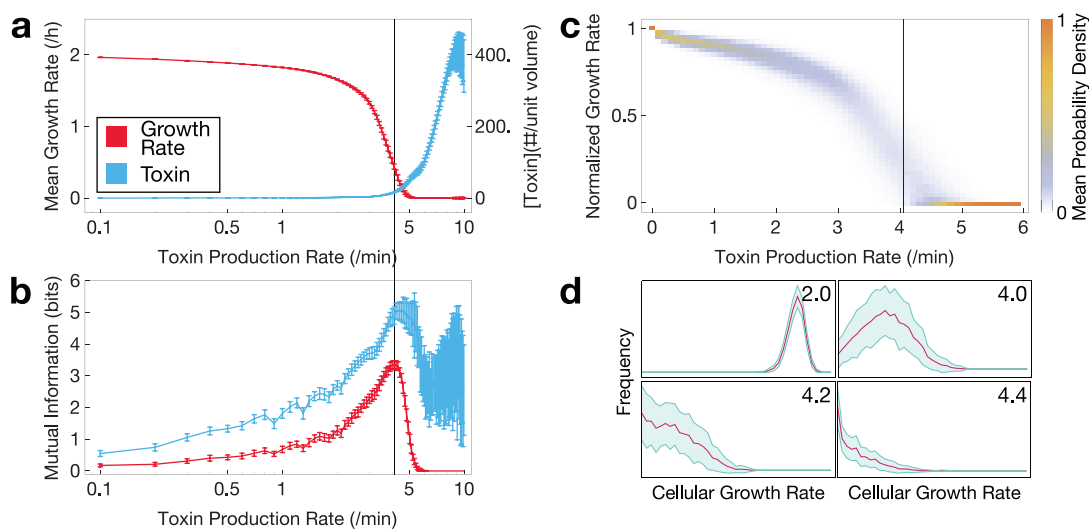

**Figure 4.** Growth, lineage information, and diversity of simulated cellular lineages at various rates of toxin production at 4 h. **a.** Average cellular growth rates (red) and toxin concentrations (blue) 150 minutes after onset of stress are proportional to toxin production rate, with distinct growth regulation regimes. Error bars indicate standard deviation. **b.** Mutual information between cell pair growth rate differences, in red (or toxin concentration difference, in blue) and their lineage distance reveals a lineage-dependent effect on cellular phenotypes near the regulatable region. **c.** Dispersion of average growth rate for low toxin production rates. Vertical bar represents the peak mutual information depicted in panel **b**. **d.** Growth rate distributions in the population at various toxin production rates as indicated. Red represents the mean frequency at a given growth rate; blue, standard deviation in the frequency.

213 toxin concentrations in the critical regime, where the population growth rate is most sensi-  
214 tive to changes in toxin production rates.

215 Distributions of growth rates reveal the underlying population structure not evident  
216 from mean growth rates shown in Figure 4a. Distributions that emerge from the model  
217 include uniformly fast (Fig. 4c, top left in Fig. 4d) or slow growing (Fig. 4c, bottom right  
218 in Fig. 4d), bimodal between fast and slow growing (top right in Fig. 4d), and long-tailed  
219 with a peak at either fast (at toxin production rate 3 /min, not shown) or slow growing  
220 (bottom left in Fig. 4d).

### 221 Fluctuating Cell Growth Dynamics in the Critical Regime

222 To examine a further indicator of criticality in this system, we calculated the dynamics  
223 of growing cell numbers below (toxin production rate 0-2.5 /min), near (toxin production  
224 rate 3-4.5 /min), and above the regulatable region (toxin production rate >4.5 /min) of  
225 growth rate. With toxin production well below the regulatable region, the predicted cell  
226 growth becomes equivalent to an uncoupled case where toxin has no effect on growth.

227 Growing cell numbers show variability between simulation replicates near the critical  
228 region (Fig. 5a). Over time, the dynamics of the mean number of growing cells approaches  
229 exponential growth at low toxin production rates, critical growth at intermediate toxin pro-  
230 duction rates (as shown in Fig. 5a), and extinction (elimination of all growth) at high toxin  
231 production rates. Mean cell numbers in critical growth show persistent oscillations that  
232 dampen as the simulated growth rates become decorrelated by noise (Fig. 5a). As toxin  
233 production approaches the critical regime, some cells accumulate high toxin and, depend-  
234 ing on individual cellular toxin accumulation, subsets of the population will enter the ex-  
235 ponential or extinction phase. Thus, the time required to conform to the exponential or

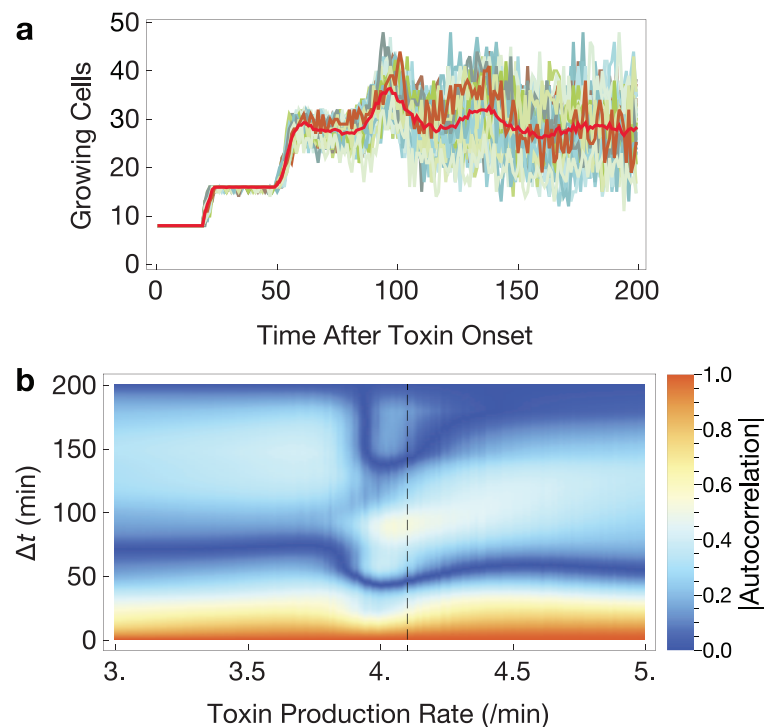

**Figure 5.** Critical slowing down of growing cell dynamics. **a.** Growing cell numbers over time in individual simulations (blue-green lines) and averaged between them (red line) reveals persistent dampening oscillations in the critical regime. **b.** Mean absolute autocorrelations near the critical regime.  $\Delta t$ , lag time after onset of toxin production. Toxin production rates with three zeroes indicate oscillatory solutions that converge slowly to the regimes of exponential growth or extinction. Vertical dashed line indicates peak lineage-growth rate mutual information; see Fig. 4.  $N = 100$  simulations for each toxin production rate.

236 extinction regimes is high in the critical regime, reminiscent longer relaxation times ob-  
237 served near critical points in other models [e.g. 26]. Autocorrelations of growing cell num-  
238 bers at lag times after the onset of toxin production reveal this effect. For example, high  
239 autocorrelation around lag time 100 min in critical regime (vertical dotted line) signifies  
240 growth remaining correlated for a longer time compared to the autocorrelation at toxin  
241 production rate 3.0 /min. The presence of more than two zeroes in the absolute autocorre-  
242 lations indicates the oscillatory regime (Fig. 5b).

243 Attainable Levels of Phenotypic Heterogeneity Under Lineage Constraints

244 If lineage is capable of constraining the attainable phenotypes of offspring cells, it  
245 stands to reason that the amount of phenotypic heterogeneity attainable in a microcolony  
246 is lowered by lineage dependence in systems that generate heterogeneity by diversifying  
247 growth rates. It is difficult to generalize what constitutes meaningful diversity in growth  
248 rates; small changes may or may not be important to fitness in the long run, but the im-  
249 portance of the distinction between growth arrested and fast-growing cells is clear. There-  
250 fore, we used two possible definitions of meaningful diversity: in one, arbitrarily small  
251 changes in growth rate or toxin concentration are meaningful. In the other extreme, we  
252 assumed that only growing versus non-growing cells (or high versus low toxin) is a mean-  
253 ingful distinction.

254 We quantified the phenotypic heterogeneity as information entropy (base 2), binning  
255 the simulated cells according to the two definitions of diversity (Fig. 6). We calculated the  
256 maximum entropy in the fine-grained binning case by assuming each cell had a unique  
257 value. Note that the maximum entropy is extensive, decreasing with lower total cell count  
258 (Fig. 6a). In the binary case, the maximum entropy is simply 1 bit. Regardless of the

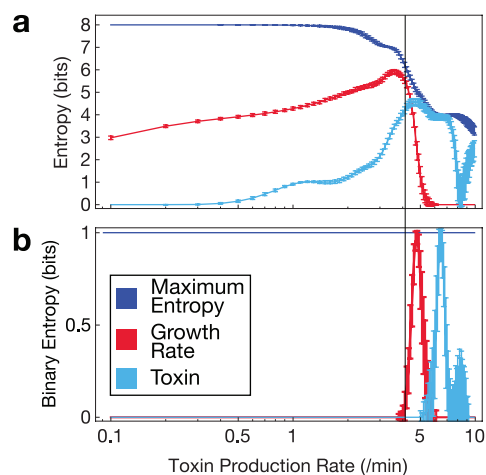

**Figure 6.** Entropy of growth rates and toxin concentrations at 250 h. Vertical line indicates the point of highest lineage-dependent mutual information between growth rate and lineage distance. **a.** Fine-grained binning. **b.** Binary binning into growing-non growing or high-low toxin concentration. Error bars indicate standard deviation.



259 definition used, the peak entropy of the population can get surprisingly close to the maxi-  
260 mum entropy. Note that peak entropy of growth rate nearly coincides with peak mutual  
261 information between growth rate differences and lineage distance (Fig. 6, vertical line).  
262 However, entropy away from this peak sharply decreases from the maximum. In the critical  
263 regime, population heterogeneity is affected by two key factors: sensitivity of growth rate  
264 to toxin and lineage dependence. Given that we observed higher lineage dependence in the  
265 critical regime, the key question here is whether this dependence reduces the possible at-  
266 tainable heterogeneity in bet-hedging. The entropy plot (Fig. 6) shows that sensitivity of  
267 growth rate to toxin dominates and thus phenotypic heterogeneity is maximal at when the  
268 lineage is most structured.

#### 269 Growth Regulation as a Criterion for Lineage Dependence

270 To explore the generality of our results, we created models with variations on the origi-  
271 nal, and tested for lineage dependence.

272 The first set of variations test two simplifications in the primary model: stability of the  
273 antitoxin, and bursty production of the molecular species. While we regard the model to be  
274 a general threshold-based growth control mechanism, it is worthwhile to determine if a  
275 toxin-antitoxin module with unstable antitoxin qualitatively reproduces our main results.  
276 Varying the stability of the antitoxin, we indeed found the same qualitative results (Fig.  
277 S4a). Similarly, simulating bursts of gene expression producing toxin and antitoxin pro-  
278 duced the same qualitative results (Fig. S4b).

279 Our next model variation was to vary the effect of growth regulation, increasing it  
280 ( $\alpha=0.3$  in  $g(T, t)$ ; see Methods below) and abolishing it completely ( $\alpha=0$  in  $g(T, t)$ ). As  
281 expected, a larger quantitative effect of toxin preserved the main results, but shifted the

282 toxin concentration necessary to see the lineage dependence (Fig. S4c). Abolishing growth  
283 regulation eliminated the peak in mutual information, and thus lineage dependence (Fig.  
284 S4d).

### 285 Distributions of Growth Arrested Cluster Sizes

286 Large clusters of growth arrested cells could have effects on the spatial development  
287 of bacterial colonies, as daughter cells tend to be correlated in space as well. We therefore  
288 asked what growth arrested cluster size distributions arise in the region where there is high  
289 mutual information between growth rate and lineage distance. We performed 10,000 sim-  
290 ulations each and clustered the end-point populations according to lineage neighbors hav-  
291 ing similar growth rate (with a cutoff of 0.01 /h to be considered growth arrested). Resulting  
292 clusters were pooled across simulations of the same parameter set. We present distributions  
293 of raw absolute cluster size, not normalized.

294 Below the critical regime, the absolute cluster size distribution is nearly exponential  
295 (Fig. 7, red line with exponential fit as gray dashed line). As the probability of growth arrest  
296 increases (with high toxin production rate), the distributions diverge from exponential to  
297 make large clusters of growth arrested cells more likely (Fig. 7). At higher toxin production  
298 rates, the distribution is bimodal between large clusters and single growth arrested cells.

299

300

301  
302  
303  
304  
305  
306  
307  
308  
309  
310  
311  
312  
313  
314  
315  
316  
317  
318  
319  
320  
321  
322  
323  
324

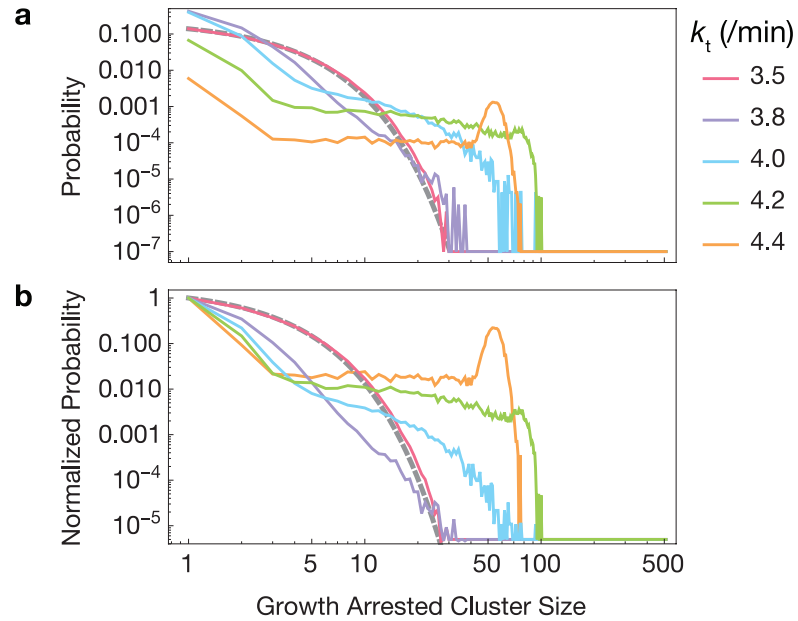

**Figure 7.** Distribution of growth arrested cluster sizes in simulated lineages. Clusters are exponentially distributed below the critical region (red line, simulation; gray dashed line, exponential fit  $ae^{-bc}$  for cluster sizes  $c$ ) but diverge from an exponential distribution near the critical region, eventually becoming bimodal (purple, blue, green, and orange lines). Each parameter set was simulated 10,000 times. **a.** Raw probability distributions. **b.** Probability distributions normalized to the probability of cluster size 1.

## 325 **Discussion**

326 Regulation of growth is a central part of phenotypic control. Many factors can control  
327 growth rate, including extrinsic conditions such as starvation, and intrinsic regulators of  
328 growth that often operate with a threshold-based mechanism. Using an experimental model  
329 of threshold-based growth arrest arising from metabolic toxicity, we tracked cell growth in  
330 a bacterial microcolony with a high probability of undergoing the growth arrest transition,  
331 and a colony grown in a condition that does not display the threshold-based growth arrest.  
332 We found several large, discrete shifts in growth rate to occur at a faster timescale than our  
333 5-minute recording intervals (Fig. 2). Quantifying the lineage dependence of cellular  
334 growth phenotype, we found that growth arrested or dead cells tend to be clustered in the  
335 lineage, as do fast-growing cells. The difference in lineage shapes between the growth ar-  
336 rest-prone and non-growth arrest prone conditions is striking (Fig. 2d,h).

337 We therefore sought the simplest possible model of microcolony growth dynamics that  
338 reproduces the effect. Our basic model captures single-cell biochemical kinetics on one  
339 scale (microscopic) interfacing population growth dynamics on another scale (macro-  
340 scopic). We found striking phenotypic lineage dependence to emerge with the following  
341 criteria: *(i)* growth rate dependence on a toxin; *(ii)* stochastic dynamics around a cellular  
342 threshold embedded within the network; *(iii)* kinetic parameters calibrated so that the pop-  
343 ulation average growth rate is near the regulatable region.

344 As the probability of cellular transition to growth arrest increases, the mutual infor-  
345 mation between growth rate and lineage distance increases to a peak, then decreases as the  
346 simulated microcolony reaches the condition of immediate growth arrest. This transition  
347 bears a resemblance to a phase transition, with correlation of microscopic length scales

348 peaking at the critical boundary. Here, the correlation length is in lineage space: we have  
349 assumed no traditional spatial information about the cells in the simulation.

350 Lineage space is a binary tree growing with extinction probability based on micro-  
351 scopic dynamics. Distances are modified by dynamical growth rates, which explains why  
352 a higher probability of heterogeneous growth results in structured trees. Thus, relating per-  
353 sistent and other threshold-based growth arrest mechanisms to the established mathematics  
354 of branching processes [27, 28] is an important direction for microbial physiology.

355 After 100 simulated minutes we imposed a continuous rate of increased toxin produc-  
356 tion (or antitoxin degradation, in one derived model) on the developing microcolony. The  
357 constant input of more toxin created an irreversible threshold. Once a cell crosses the  
358 growth arrest threshold, there is an irreversible stoppage of growth that arises from toxin  
359 growth feedback. The growth arrest condition can then be considered an absorbing state.  
360 Continuous transitions from active to absorbing states are generically characterized by the  
361 scaling properties of critical directed percolation [29-31]. Our model qualitatively repro-  
362 duces characteristics of directed percolation, including longer relaxation times near the  
363 critical region (Fig. 5) and different regimes of growth arrested cluster size distribution  
364 (Fig. 7). However, the dimensionality of the space is unclear, and may be shaped by the  
365 probability of growth arrest. Thus, we are doubtful that bet hedging quantitatively con-  
366 forms to the classic criteria for directed percolation.

367 If lineages impart spatial structure onto growth phenotypes, then do they impose an  
368 upper limit to the level of phenotypic heterogeneity that can be attained by a microcolony?  
369 The population is most sensitive to fluctuations directly in the region with the highest lin-  
370 eage dependence, the latter of which appears to imply a dampening of phenotypic

371 heterogeneity. However, multiple methods of measuring total population entropy suggest  
372 that the population can still approach the maximum total entropy in cases where growth  
373 rates are both finely-binned and binned into only two phenotypes – growing and growth  
374 arrested (Fig. 6). Heterogeneity is reduced as the population reaches either extreme of high  
375 or low average toxin level. Thus, counterintuitively, a more highly structured lineage yields  
376 a higher level of heterogeneity. Lineage plays an interesting role in determining the phe-  
377 notypes of extant growing cells, but it does not appear to restrict what phenotypes can be  
378 attained.

379       The purely intracellular phenomena considered here allow lineage to be the only type  
380 of space considered. However, closely related cells in many conditions, such as surface-  
381 attached conditions or channels, will be physically closer together as well. In many bacte-  
382 rial colonies with a substantial chance of endogenous and exogenous conditions interacting  
383 to determine the growth arrest transition (such as quorum sensing), an information metric  
384 that includes components of both real space and lineage space will need to be considered.

385

386

## 387 **Methods**

### 388 Cell Culture Conditions

389 *E. coli* B REL606 *lacI*<sup>-</sup> P<sub>lacO1</sub>-GFP was grown from -80° C cryogenic culture for 18 h  
390 in LB medium in a shaking incubator (37° C), acclimatized by incubating in Davis minimal  
391 medium containing either 50 mg/ml lactose (DMLac50) or 2 mg/ml glucose (DMglc2) for  
392 24 h, and resuspended either in fresh DMLac50 or DMglc2 culture, respectively, for 3 hours  
393 before beginning time-lapse microscopy.

### 394 Microscopy and Image Analysis

395 We used an Olympus IX81 inverted fluorescence microscope with an incubated imag-  
396 ing chamber (Olympus, Tokyo, Japan). The chamber with objective was pre-heated, bac-  
397 terial cultures were added to a pre-heated CellAsic ONIX microfluidic plate (Millipore,  
398 Billerica, Massachusetts) at an approximate OD<sub>450</sub> of 0.005, and a continuous media flow  
399 of 1 psi DMLac50 or DMglc2 was maintained for the duration of the experiment. Images  
400 in brightfield and green fluorescence (488 nm stimulation / 509 nm emission) channels  
401 were captured every 5 minutes with a 4k CMOS camera, followed by ZDC autofocus. For  
402 the DMLac50 experiment, we used a 100x oil immersion objective. Due to technical issues  
403 with the objective, we used a 60x air objective for the DMglc2 experiment. Thus, the pixel  
404 lengths of the cells between the two experiments should not be directly compared.

405 Images were cropped after identifying a stable microcolony originating from a single  
406 cell. We developed a semi-supervised cell tracking algorithm in Mathematica (Wolfram  
407 Research, Champaign, Illinois) with manually input cell division times and cell lengths.  
408 From this information, we reconstructed the lineage and approximated growth rates with  
409 exponential growth models. When mapping the growth rates to the lineages in Fig. 2, we

410 approximated growth rates of cells with non-significant exponential fits using piecewise  
411 linear regression as reviewed in [32].

#### 412 Multiscale Growth Simulation Framework

413 To capture the minimal mechanisms necessary that recapitulate non-genetic inheritance  
414 and effects of cellular lineage, we created a multiscale growth simulation framework with  
415 individual cell agents, each containing a molecular network of interacting proteins, referred  
416 to as toxin and antitoxin, with toxin affecting cellular growth rate.

417 We track the simulated number of toxin and antitoxin molecules as well as cell volumes  
418 for each cell agent across time. In the next time step,  $t+\delta t$ , the number of toxin and antitoxin  
419 molecules are determined by stochastic simulation (below) and are updated for that cell.  
420 Cellular growth rates are set by a deterministic function of the toxin concentration ( $\#/vol$ ).  
421 The change in the volume ( $\delta v$ ) in  $\delta t$  is determined by the amount of toxin present at that  
422 time. When cell volume doubles, the number of each molecule is distributed binomially  
423 into the two daughter cells. From that time on, the two daughter cells are labeled as differ-  
424 ent cells and are iterated in the same way. We initiate each simulation as a single cell with  
425 no toxin and allow growth for a few generations (100 minutes) before applying toxin pro-  
426 duction rate (or antitoxin degradation rate) of a given quantity. The primary purpose of this  
427 model is to capture the qualitative effect of the growth arrest threshold, so several important  
428 details about the biophysics of kinetics in growing cells were omitted, such as the effects  
429 of chromosome replication and the volume dependence of bimolecular stochastic reaction  
430 propensities.

#### 431 Estimation of Mutual Information from Simulated Lineages



432 We sought to develop a sampling methodology to ensure independent, identically dis-  
433 tributed samples from lineage simulations to estimate the mutual information between lin-  
434 eage distance  $d$  and phenotypic differences between pairs of cells  $\varphi$ . Phenotypic differences  
435 ( $\varphi$ ) could be growth rate or intracellular toxin concentration. To do so, we performed 100  
436 independent simulations in each condition, and randomly drew a single pair of cells from  
437 each lineage. Our estimate of mutual information was calculated from the resulting distri-  
438 bution of i.i.d. samples:  $I(D, \Phi) = \sum_{\varphi \in \Phi} \sum_{d \in D} p(d, \varphi) \log_2 \left( \frac{p(d, \varphi)}{p(d)p(\varphi)} \right)$ . A more accurate es-  
439 timate of absolute mutual information may extrapolate to an infinite sample size. In our  
440 case, the relative mutual information between different locations in parameter space suf-  
441 fices to demonstrate the existence of a strong lineage dependence for certain parameter  
442 ranges. To estimate the uncertainty of our relative mutual information estimate, we  
443 resampled 100 cell pairs with replacement and present the resulting mean  $\pm$  standard devi-  
444 ation. Entropy was calculated by  $H(X) = -\sum_{i=1}^n p(x_i) \log_2 p(x_i)$ , where  $p(x_i)$  repre-  
445 sents the probability mass function of a discrete variable  $X$ .  $X$  could be growth rate or toxin  
446 concentration.

447

#### 448 Stochastic Toxin-Antitoxin Threshold Model

449 We considered a simple network consisting of three variables: toxin, antitoxin and  
450 toxin-antitoxin bound complex. Possible reaction events are synthesis of toxin and anti-  
451 toxin, and binding and unbinding between toxin and antitoxin molecules. The reaction  
452 scheme for the basic model is:

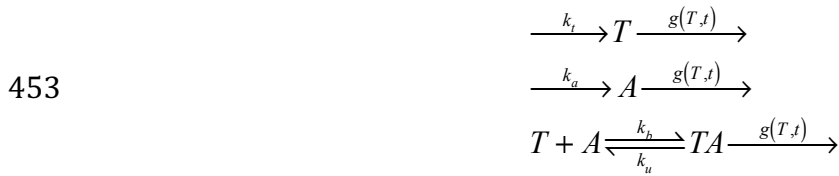

454 The parameter  $k_t$  is the toxin production rate varied in the simulations. Antitoxin production  
455 parameter,  $k_a$ , is kept constant ( $k_a = 4.2$  /min) to allow the production ratio of toxin and  
456 antitoxin to be changed. Growth-mediated loss is implemented through  $g(T, t)$  which is a  
457 function of the cell volume in the algorithm (below). Parameters  $k_b$  and  $k_u$  are binding and  
458 unbinding rates;  $k_b = 0.1$  and  $k_u = 0.1$  throughout. In the most basic model, each species is  
459 considered long-lived on the timescales of the simulation, so we do not consider any addi-  
460 tional degradation processes. Variations on this model are discussed in Results.

461 The relationship between toxin concentration and cellular growth rate, the most phe-  
462 nomenological part of the framework, captures the interface between molecular and popu-  
463 lation dynamic scales. We reasoned that, while some random factors may reduce or in-  
464 crease the effect of toxin, the generality with which toxin affects global protein synthesis  
465 rates [11, 33-37] means that many stochastic effects will cancel, resulting in a nearly de-  
466 terministic relationship. Because toxin levels generally halt ongoing processes without sig-  
467 nificant delay [38-41], we approximated the effect of a given toxin level to be instantane-  
468 ous. This assumption is supported by our experimental results, which show shifts in growth  
469 rate faster than the 5 minute intervals measured (Fig. 2). We thus constructed a determin-  
470 istic function to reflect the functional dependence of growth on toxin concentrations:  
471  $g(T, t) = \lambda e^{-\alpha T(t)/\Omega(t)}$ , where  $\alpha$  is a parameter that represents the toxicity of the toxin,  $T$ .  
472 We used  $\alpha = 0, 0.1$  and  $0.3$  to represent cases with no toxicity, moderate toxicity, and high  
473 toxicity, respectively. Python scripts are given in S1-S3 Model.

#### 474 Simplified Computational Model of Binomial Inheritance

475 To illustrate the effects of growth arrest on distributions of growth-modulating cyto-  
476 plasmic contents (**Fig. 1**), we created a simplified computational model with constant pro-  
477 duction, constant sub-threshold generation times, and binomially distributed molecular  
478 contents between two daughter cells. One simulation for each initial condition was run for  
479 12 generations, with 10 molecules produced per generation, and a growth arrest threshold  
480 of 20 molecules. Initial conditions were 0, 10, 20, or 30 molecules. A second case with no  
481 threshold was simulated with the same parameters and initial conditions. The Mathematica  
482 code is given in S4 Model.

483

#### 484 Deterministic Molecular-Scale Model as a Basis for Growth Feedback

485 The exact functional dependency of growth on toxin is unknown. In our stochastic  
486 simulation framework, we considered an exponential dependence of growth on toxin. Fig.  
487 1b depicts a deterministic model of toxin growth feedback by a free toxin as follows:

488  $\dot{T} = k_t - \gamma \frac{\theta}{\theta + T} T$ , where  $k_t$  is the toxin production rate,  $\gamma$  is the maximum growth rate,

489 and  $\theta$  determines the toxicity level of the toxin. We chose the Hill form for the determin-  
490 istic model because it has a closed-form steady state. The steady state is  $\hat{T} = \frac{k_t}{\gamma - \frac{k_t}{\theta}}$ . When

491  $k_t/\theta > \gamma$ , there is no steady state at this scale and the containing cell is expected to enter  
492 growth arrest. This simple model demonstrates the basis for growth feedback-induced  
493 growth arrest in a single cell. For Fig 1b, parameters are:  $k_t = 4.2$  /min,  $\gamma = 0.023$ , and  $\theta =$   
494 100 molecules. We note that the basic growth arrest threshold effect readily emerges in  
495 both Hill and exponential model forms, and likely a variety of other mathematical forms.

496 **Acknowledgments**

497 We acknowledge Sheng Chen, Dominique Chu, Eric J. Deeds, and Uwe Täuber for useful  
498 conversations. Microscopy experiments were performed in the Microscopy and Analytical  
499 Imaging Laboratory at the University of Kansas. This project was supported by Institu-  
500 tional Development Awards (IDeA) from the National Institute of General Medical Sci-  
501 ences of the National Institutes of Health under Grant Numbers P20GM103418 and  
502 P20GM103638. The content is solely the responsibility of the authors and does not neces-  
503 sarily represent the official views of the National Institute of General Medical Sciences or  
504 the National Institutes of Health.

## 505 References

- 506 1. Klumpp S, Zhang Z, Hwa T. Growth rate-dependent global effects on gene  
507 expression in bacteria. *Cell*. 2009;139(7):1366-75.
- 508 2. Tan C, Marguet P, You L. Emergent bistability by a growth-modulating positive  
509 feedback circuit. *Nat Chem Biol*. 2009;5(11):842-8.
- 510 3. Ray JCJ, Tabor JJ, Igooshin OA. Non-transcriptional regulatory processes shape  
511 transcriptional network dynamics. *Nat Rev Microbiol*. 2011;9(11):817-28.
- 512 4. Lewis K. Persister cells. *Annu Rev Microbiol*. 2010;64:357-72.
- 513 5. Deris JB, Kim M, Zhang Z, Okano H, Hermsen R, Groisman A, et al. The innate  
514 growth bistability and fitness landscapes of antibiotic-resistant bacteria. *Science*.  
515 2013;342(6162):1237435.
- 516 6. Balaban NQ. Persistence: mechanisms for triggering and enhancing phenotypic  
517 variability. *Curr Opin Genet Dev*. 2011;21(6):768-75.
- 518 7. Amato SM, Orman MA, Brynildsen MP. Metabolic control of persister formation  
519 in *Escherichia coli*. *Mol Cell*. 2013;50(4):475-87.
- 520 8. Maisonneuve E, Castro-Camargo M, Gerdes K. (p)ppGpp controls bacterial  
521 persistence by stochastic induction of toxin-antitoxin activity. *Cell*. 2013;154(5):1140-50.
- 522 9. Pu Y, Zhao Z, Li Y, Zou J, Ma Q, Zhao Y, et al. Enhanced efflux activity facilitates  
523 drug tolerance in dormant bacterial cells. *Mol Cell*. 2016;62(2):284-94.
- 524 10. Germain E, Roghianian M, Gerdes K, Maisonneuve E. Stochastic induction of  
525 persister cells by HipA through (p)ppGpp-mediated activation of mRNA endonucleases.  
526 *Proc Natl Acad Sci U S A*. 2015;112(16):5171-6.
- 527 11. Pedersen K, Christensen SK, Gerdes K. Rapid induction and reversal of a  
528 bacteriostatic condition by controlled expression of toxins and antitoxins. *Mol Microbiol*.  
529 2002;45(2):501-10.
- 530 12. Rotem E, Loinger A, Ronin I, Levin-Reisman I, Gabay C, Shoshitashvili N, et al.  
531 Regulation of phenotypic variability by a threshold-based mechanism underlies bacterial  
532 persistence. *Proc Natl Acad Sci U S A*. 2010;107(28):12541-6.
- 533 13. Cataudella I, Trusina A, Sneppen K, Gerdes K, Mitarai N. Conditional  
534 cooperativity in toxin-antitoxin regulation prevents random toxin activation and promotes  
535 fast translational recovery. *Nucleic Acids Res*. 2012;40(14):6424-34.
- 536 14. Ray JCJ. Survival of phenotypic information during cellular growth transitions.  
537 *ACS Synth Biol*. 2016;5(8):810-6.
- 538 15. Acar M, Becskei A, van Oudenaarden A. Enhancement of cellular memory by  
539 reducing stochastic transitions. *Nature*. 2005;435(7039):228-32.
- 540 16. Nevozhay D, Adams RM, Van Itallie E, Bennett MR, Balázsi G. Mapping the  
541 environmental fitness landscape of a synthetic gene circuit. *PLoS Comput Biol*.  
542 2012;8(4):e1002480.
- 543 17. Ray JCJ, Wickersheim ML, Jalihal AP, Adeshina YO, Cooper TF, Balázsi G.  
544 Cellular growth arrest and persistence from enzyme saturation. *PLoS Comput Biol*.  
545 2016;12(3):e1004825.
- 546 18. Ni M, Decrulle AL, Fontaine F, Demarez A, Taddei F, Lindner AB. Pre-disposition  
547 and epigenetics govern variation in bacterial survival upon stress. *PLoS Genet*.  
548 2012;8(12):e1003148.

- 549 19. Hormoz S, Desprat N, Shraiman BI. Inferring epigenetic dynamics from kin  
550 correlations. *Proc Natl Acad Sci U S A*. 2015;112(18):E2281-E9.
- 551 20. Sandler O, Mizrahi SP, Weiss N, Agam O, Simon I, Balaban NQ. Lineage  
552 correlations of single cell division time as a probe of cell-cycle dynamics. *Nature*.  
553 2015;519(7544):468-71.
- 554 21. Plank LD, Harvey JD. Generation time statistics of *Escherichia coli* B measured by  
555 synchronous culture techniques. *J Gen Microbiol*. 1979;115(1):69-77.
- 556 22. Semple C, Steel M. *Phylogenetics*. New York: Oxford University Press; 2003.
- 557 23. Azevedo RBR, Lohaus R, Braun V, Gumbel M, Umamaheshwar M, Agapow P-M,  
558 et al. The simplicity of metazoan cell lineages. *Nature*. 2005;433(7022):152-6.
- 559 24. Wilms J, Vidal J, Verstraete F, Dusuel S. Finite-temperature mutual information in  
560 a simple phase transition. *J Stat Mech: Theory E*. 2012;P01023.
- 561 25. Wicks RT, Chapman SC, Dendy RO. Mutual information as a tool for identifying  
562 phase transitions in dynamical complex systems with limited data. *Phys Rev E*. 2007;75(5  
563 Pt 1):051125.
- 564 26. Chen S, Täuber UC. Non-equilibrium relaxation in a stochastic lattice Lotka–  
565 Volterra model. *Phys Biol*. 2016;13(2):025005.
- 566 27. Haccou P, Jagers P, Vatutin VA. *Branching Processes: Variation, Growth and*  
567 *Extinction of Populations*. Dieckmann U, Metz JAJ, editors. New York: Cambridge  
568 University Press; 2005.
- 569 28. Kimmel M, Axelrod DE. *Branching Processes in Biology*. Second ed. New York:  
570 Springer; 2015.
- 571 29. Janssen HK. On the nonequilibrium phase transition in reaction-diffusion systems  
572 with an absorbing stationary state. *Z Phys B Cond Matt*. 1981;42(2):151-4.
- 573 30. Grassberger P. On phase transitions in Schlögl's second model. *Z Phys B Cond*  
574 *Matt*. 1982;47(4):365-74.
- 575 31. Täuber UC. *Critical dynamics - A field theory approach to equilibrium and non-*  
576 *equilibrium scaling behavior*. Cambridge: Cambridge University Press; 2014.
- 577 32. Malash GF, El-Khaiary MI. Piecewise linear regression: A statistical method for  
578 the analysis of experimental adsorption data by the intraparticle-diffusion models. *Chem*  
579 *Eng J*. 2010;163(3):256-63.
- 580 33. Lewis K. Persister cells, dormancy and infectious disease. *Nat Rev Microbiol*.  
581 2007;5(1):48-56.
- 582 34. Christensen SK, Pedersen K, Hansen FG, Gerdes K. Toxin-antitoxin loci as stress-  
583 response-elements: ChpAK/MazF and ChpBK cleave translated RNAs and are  
584 counteracted by tmRNA. *J Mol Biol*. 2003;332(4):809-19.
- 585 35. Correia FF, D'Onofrio A, Rejtar T, Li L, Karger BL, Makarova K, et al. Kinase  
586 activity of overexpressed HipA is required for growth arrest and multidrug tolerance in  
587 *Escherichia coli*. *J Bacteriol*. 2006;188(24):8360-7.
- 588 36. Korch SB, Hill TM. Ectopic overexpression of wild-type and mutant hipA genes in  
589 *Escherichia coli*: effects on macromolecular synthesis and persister formation. *J Bacteriol*.  
590 2006;188(11):3826-36.
- 591 37. Levy SB, Marshall B. Antibacterial resistance worldwide: causes, challenges and  
592 responses. *Nat Med*. 2004;10(12 Suppl):S122-9.

- 593 38. Germain E, Roghanian M, Gerdes K, Maisonneuve E. Stochastic induction of  
594 persister cells by HipA through (p)ppGpp-mediated activation of mRNA endonucleases.  
595 Proc Natl Acad Sci U S A. 2015;112(16):5171-6.
- 596 39. Germain E, Castro-Roa D, Zenkin N, Gerdes K. Molecular mechanism of bacterial  
597 persistence by HipA. Mol Cell. 2013;52(2):248-54.
- 598 40. Kasy I, Rotem E, Weiss N, Ronin I, Balaban NQ, Glaser G. HipA-mediated  
599 antibiotic persistence via phosphorylation of the glutamyl-tRNA-synthetase. Nat Commun.  
600 2013;4:3001.
- 601 41. Bokinsky G, Baidoo EE, Akella S, Burd H, Weaver D, Alonso-Gutierrez J, et al.  
602 HipA-triggered growth arrest and beta-lactam tolerance in Escherichia coli are mediated  
603 by RelA-dependent ppGpp synthesis. J Bacteriol. 2013;195(14):3173-82.  
604

## Supporting Information Captions

**S1 Video. *E. coli* microcolony undergoing frequent growth arrest.** Time-lapse fluorescence microscopy of a cell lineage of *Escherichia coli* B. REL606 *lacI*<sup>-</sup> P<sub>lacO1</sub>-GFP in DMlac50. Cells are tracked and measured as indicated. Numbers represent time (minutes) after the first frame. Experimental details are given in Methods.

**S2 Video. *E. coli* microcolony growing without the growth arrest threshold.** Time-lapse fluorescence microscopy of a cell lineage of *Escherichia coli* B. REL606 *lacI*<sup>-</sup> P<sub>lacO1</sub>-GFP in DMglc2. Cells are tracked and measured as indicated. Numbers represent time (minutes) after the first frame. Experimental details are given in Methods.

**S1 Figure. Growth trajectories for all cells in the microcolony depicted in Figure 2.**

**S2 Figure. Probability distribution of lineage distance (time since most recent common ancestor) for the experimental lineage.** All cells (**a**), only non-growth-arrested cells (**b**), and only growth-arrested cells (**c**) in the lineage shown in Figure 2d.  $p < 0.01$  for growth-arrested cells to not to have lower lineage distances versus either of the other two groups (one-tailed Mann-Whitney U test).

**S3 Figure. Non-exponential cell length trajectories.** Lengths of cells between divisions were tested for a significant fit to an exponential growth model in the growth arrest-prone condition. These cases failed the significance test with a Bonferroni-adjusted  $\alpha = 0.05$  (adjusted value = 0.000424).

**S4 Figure. Computational model extensions preserve the central results.** **a.** Altering toxin degradation rates to represent the precise mechanism of toxin-antitoxin systems. **b.** Altering toxin and antitoxin production so that they are bursty with a telegraph (ON-OFF)



model. **c.** Increasing toxicity with parameter  $\alpha = 0.3$ . **d.** Eliminating growth feedback ( $\alpha = 0$ ) eliminates the peak of mutual information along with the lack of macroscopic growth regulation.

**S1 Model.** Python script for simulating lineages with stochastic simulation of the intracellular toxin-antitoxin system.

**S2 Model.** Python script for simulating lineages with stochastic simulation of the intracellular toxin-antitoxin system with bursty telegraph model of toxin and antitoxin production.

**S3 Model.** Python script for simulating lineages with stochastic simulation of the intracellular toxin-antitoxin system with fast degradation of the antitoxin.

**S4 Model.** Simplified computational model of binomial inheritance Mathematica file.

**S1 Data.** Data used to generate plots in Figure 3.
